# Supplementary material for: Evaluating the effect of exosome-encapsulated miR-4289 on menstrual blood-derived mesenchymal stem cells from endometriosis patients
Source: Research Square preprint supplement (doi:10.21203/rs.3.rs-6558623/v1), 2025-05-12
Supplement: Supplementary file 2 [file 4967c60cb5dd46cad9d96106.xlsx]

## Sheet: ER
		GAPDh	ER					انحراف معیار								انحراف معیار
1	m.f	20.95	26.44	5.49	6.09667	-0.606667	1.52274	0.483633				میانگین ژن GAPDH در گروه m.f	20.7167			0.483633
2	m.f	19.85	26.77	6.92	6.09667	0.823333	0.565135					میانگین ژن ER در گروه m.f	26.77	0.0150579	1
3	m.f	21.35	27.23	5.88	6.09667	-0.216667	1.16205
4	Endo	22.31	27.93	5.62	6.09667	-0.476667	1.39152	0.0971653				میانگین ژن GAPDH در گروه Endo	22.77			0.856043
5	Endo	23.23	29	5.77	6.09667	-0.326667	1.25411					میانگین ژن ER در گروه Endo	28.465	0.0193034	1.28194
6	Transfect	22.98	29.58	6.6	6.09667	0.503333	0.705475	0.145839				میانگین ژن GAPDH در گروه Transfect	21.395			0.785025
7	Transfect	19.81	26.04	6.23	6.09667	0.133333	0.911722					میانگین ژن ER در گروه Transfect	27.81	0.0117191	0.778265
8	T-exo	20.95	26.89	5.94	6.09667	-0.156667	1.11471	0.36874				میانگین ژن GAPDH در گروه T-exo	20.85			0.36874
9	T-exo	20.75	27.6	6.85	6.09667	0.753333	0.593231					میانگین ژن ER در گروه T-exo	27.245	0.0118826	0.789129
10	EXO	21.82	28.82	7	6.09667	0.903333	0.53465	0.0243354				میانگین ژن GAPDH در گروه EXO	20.65			2.82324
11	EXO	19.48	26.39	6.91	6.09667	0.813333	0.569066					میانگین ژن ER در گروه EXO	27.605	0.00806002	0.535268
12	Nar	21.67	27.84	6.17	6.09667	0.0733333	0.950439	0.126178				میانگین ژن GAPDH در گروه NAR	22.06			0.58205
13	Nar	22.45	28.92	6.47	6.09667	0.373333	0.771997					میانگین ژن ER در گروه NAR	28.38	0.0125167	0.831238
14	BB	21.67	27.67	6	6.09667	-0.0966667	1.0693	0.187044
15	BB	22.35	28.76	6.41	6.09667	0.313333	0.80478

## Sheet: mir4289
		u6	mir4289					انحراف معیار								انحراف معیار
1	Endo	21.3	29.85	8.55	8.475	0.075	0.949342	0.0375784				میانگین ژن u6 در گروه m.f	20.875			0.132528
2	Endo	20.9	29.44	8.54	8.475	0.065	0.955945					میانگین ژن mir4289 در گروه m.f	29.35	0.00281042	1
3	Endo	22.04	30.49	8.45	8.475	-0.025	1.01748
4	m.f	19.51	27.85	8.34	8.475	-0.135	1.09809	0.132528				میانگین ژن u6 در گروه Endo	21.4133			0.037578
5	m.f	22.24	30.85	8.61	8.475	0.135	0.91067					میانگین ژن mir4289 در گروه Endo	29.9267	0.00273673	0.973779
6	Transfect	21.45	28.45	7	8.475	-1.475	2.77984	0.496473				میانگین ژن u6 در گروه Transfect	21.87			0.496473
7	Transfect	22.29	29.71	7.42	8.475	-1.055	2.07772					میانگین ژن mir4289 در گروه Transfect	29.08	0.0067542	2.40327
8	T-exo	21.69	29.65	7.96	8.475	-0.515	1.42899	0.126366				میانگین ژن u6 در گروه T-exo	21.335			0.126366
9	T-exo	20.98	28.77	7.79	8.475	-0.685	1.6077					میانگین ژن mir4289 در گروه T-exo	29.21	0.0042598	1.51572
												میانگین ژن u6 در گروه EXO	#DIV/0!
												میانگین ژن mir4289 در گروه EXO	#DIV/0!	#DIV/0!	#DIV/0!
												میانگین ژن u6 در گروه NAR	#DIV/0!
												میانگین ژن mir4289 در گروه NAR	#DIV/0!	#DIV/0!	#DIV/0!

## Sheet: B-catenin
				GAPDh	beta-Catenin					انحراف معیار								انحراف معیار
		1	m.f	20.95	23.54	2.59	2.81	-0.22	1.16473	0.139671				میانگین ژن GAPDH در گروه m.f	20.7167			0.18626
		2	m.f	19.85	22.73	2.88	2.81	0.07	0.952638					میانگین ژن b-cat در گروه m.f	22.73	0.2477	1
		3	m.f	21.35	24.31	2.96	2.81	0.15	0.90125
		4	Endo	22.31	23.94	1.63	2.81	-1.18	2.26577	0.0564993				میانگین ژن GAPDH در گروه Endo	22.77			0.764398
		5	Endo	23.23	24.81	1.58	2.81	-1.23	2.34567					میانگین ژن b-cat در گروه Endo	24.375	0.328736	1.32715
		6	Transfect	22.98	25.18	2.2	2.81	-0.61	1.52626	0.272586				میانگین ژن GAPDH در گروه Transfect	21.395			2.25025
		7	Transfect	19.81	22.43	2.62	2.81	-0.19	1.14076					میانگین ژن b-cat در گروه Transfect	23.805	0.188156	0.759611
		8	T-exo	20.95	23.8	2.85	2.81	0.04	0.972655	0.369247				میانگین ژن GAPDH در گروه T-exo	20.85			0.182814
		9	T-exo	20.75	22.98	2.23	2.81	-0.58	1.49485					میانگین ژن b-cat در گروه T-exo	23.39	0.171943	0.694157
		10	EXO	21.82	24.14	2.32	2.81	-0.49	1.40444	0.169501				میانگین ژن GAPDH در گروه EXO	20.65			1.15493
		11	EXO	19.48	22.07	2.59	2.81	-0.22	1.16473					میانگین ژن b-cat در گروه EXO	23.105	0.182378	0.736284
		12	Nar	21.67	23.91	2.24	2.81	-0.57	1.48452	0.191151				میانگین ژن GAPDH در گروه NAR	22.06			6.36299
		13	Nar	22.45	24.98	2.53	2.81	-0.28	1.21419					میانگین ژن b-cat در گروه NAR	24.445	0.191445	0.772889
		14	BB	21.67	23.28	1.61	2.81	-1.2	2.2974	0.0769398
		15	BB	22.35	24.03	1.68	2.81	-1.13	2.18859

## Sheet: vegf
		GAPDh	vegf					انحراف معیار								انحراف معیار
1	m.f	20.95	25.98	5.03	5.30667	-0.276667	1.21139	0.180425				میانگین ژن GAPDH در گروه m.f	20.7167			0.180425
2	m.f	19.85	25.22	5.37	5.30667	0.0633333	0.95705					میانگین ژن vegf در گروه m.f	25.22	0.0440922	1
3	m.f	21.35	26.87	5.52	5.30667	0.213333	0.862542
4	Endo	22.31	26.44	4.13	5.30667	-1.17667	2.26054	0.424797				میانگین ژن GAPDH در گروه Endo	22.77			0.249426
5	Endo	23.23	27.02	3.79	5.30667	-1.51667	2.86129					میانگین ژن vegf در گروه Endo	26.73	0.0642571	1.45734
6	Transfect	22.98	29.71	6.73	5.30667	1.42333	0.37285	0.065471				میانگین ژن GAPDH در گروه Transfect	21.395			0.065471
7	Transfect	19.81	26.22	6.41	5.30667	1.10333	0.46544					میانگین ژن vegf در گروه Transfect	27.965	0.0105253	0.23871
8	T-exo	20.95	27.39	6.44	5.30667	1.13333	0.455861	0.0479318				میانگین ژن GAPDH در گروه T-exo	20.85			0.00445317
9	T-exo	20.75	26.99	6.24	5.30667	0.933333	0.523647					میانگین ژن vegf در گروه T-exo	27.19	0.0123444	0.279968
10	EXO	21.82	27.18	5.36	5.30667	0.0533333	0.963707	0.161414				میانگین ژن GAPDH در گروه EXO	20.65			0.639156
11	EXO	19.48	25.23	5.75	5.30667	0.443333	0.735433					میانگین ژن vegf در گروه EXO	26.205	0.0212705	0.482411
12	Nar	21.67	28.31	6.64	5.30667	1.33333	0.39685	0.102717				میانگین ژن GAPDH در گروه NAR	22.06			0.102717
13	Nar	22.45	28.64	6.19	5.30667	0.883333	0.542113					میانگین ژن vegf در گروه NAR	28.475	0.0117191	0.265785
14	BB	21.67	25.57	3.9	5.30667	-1.40667	2.65124	0.0932043
15	BB	22.35	26.18	3.83	5.30667	-1.47667	2.78305

## Sheet: mmp2
		GAPDh	mmp2					انحراف معیار								انحراف معیار
1	m.f	20.95	27.27	6.32	6.33333	-0.0133333	1.00928	0.089995				میانگین ژن GAPDH در گروه m.f	20.7167			0.180425
2	m.f	19.85	26.32	6.47	6.33333	0.136667	0.909618					میانگین ژن mmp2 در گروه m.f	26.32	0.0205697	1
3	m.f	21.35	27.56	6.21	6.33333	-0.123333	1.08925
4	Endo	22.31	26.92	4.61	6.33333	-1.72333	3.30198	0.156358				میانگین ژن GAPDH در گروه Endo	22.77			0.249426
5	Endo	23.23	27.94	4.71	6.33333	-1.62333	3.08086					میانگین ژن mmp2 در گروه Endo	27.43	0.0395549	1.92297
6	Transfect	22.98	28.62	5.64	6.33333	-0.693333	1.61702	0.0568462				میانگین ژن GAPDH در گروه Transfect	21.395			0.065471
7	Transfect	19.81	25.38	5.57	6.33333	-0.763333	1.69741					میانگین ژن mmp2 در گروه Transfect	27	0.020546	0.998845
8	T-exo	20.95	29.22	8.27	6.33333	1.93667	0.261219	0.0783263				میانگین ژن GAPDH در گروه T-exo	20.85			0.00445317
9	T-exo	20.75	28.51	7.76	6.33333	1.42667	0.371989					میانگین ژن mmp2 در گروه T-exo	28.865	0.00386585	0.187939
10	EXO	21.82	27.75	5.93	6.33333	-0.403333	1.32256	0.019246				میانگین ژن GAPDH در گروه EXO	20.65			0.639156
11	EXO	19.48	25.44	5.96	6.33333	-0.373333	1.29534					میانگین ژن mmp2 در گروه EXO	26.595	0.0162322	0.789129
12	Nar	21.67	27.14	5.47	6.33333	-0.863333	1.81924	0.15089				میانگین ژن GAPDH در گروه NAR	22.06			0.102717
13	Nar	22.45	28.1	5.65	6.33333	-0.683333	1.60585					میانگین ژن mmp2 در گروه NAR	27.62	0.0211969	1.03049
14	BB	21.67	26.43	4.76	6.33333	-1.57333	2.97592	0.230566
15	BB	22.35	26.96	4.61	6.33333	-1.72333	3.30198

## Sheet: mmp9
		GAPDh	mmp9					انحراف معیار								انحراف معیار
1	m.f	20.95	29.39	8.44	8.44667	-0.00666667	1.00463	0.0623465				میانگین ژن GAPDH در گروه m.f	20.7167			0.307835
2	m.f	19.85	28.39	8.54	8.44667	0.0933333	0.937354					میانگین ژن mmp9 در گروه m.f	28.39	0.00489888	1
3	m.f	21.35	29.71	8.36	8.44667	-0.0866667	1.06191
4	Endo	22.31	27.75	5.44	8.44667	-3.00667	8.03705	0.969986				میانگین ژن GAPDH در گروه Endo	22.77			0.00105091
5	Endo	23.23	28.94	5.71	8.44667	-2.73667	6.66529					میانگین ژن mmp9 در گروه Endo	28.345	0.0209777	4.28214
6	Transfect	22.98	29.27	6.29	8.44667	-2.15667	4.45883	0.779947				میانگین ژن GAPDH در گروه Transfect	21.395			0.0343637
7	Transfect	19.81	26.51	6.7	8.44667	-1.74667	3.35582					میانگین ژن mmp9 در گروه Transfect	27.89	0.0110869	2.26315
8	T-exo	20.95	27.98	7.03	8.44667	-1.41667	2.66968	0.708929				میانگین ژن GAPDH در گروه T-exo	20.85			0.0525756
9	T-exo	20.75	27.32	6.57	8.44667	-1.87667	3.67226					میانگین ژن mmp9 در گروه T-exo	27.65	0.00897421	1.83189
10	EXO	21.82	28.6	6.78	8.44667	-1.66667	3.1748	0.462023				میانگین ژن GAPDH در گروه EXO	20.65			0.00538595
11	EXO	19.48	25.99	6.51	8.44667	-1.93667	3.8282					میانگین ژن mmp9 در گروه EXO	27.295	0.00999207	2.03967
12	Nar	21.67	28.55	6.88	8.44667	-1.56667	2.9622	0.688461				میانگین ژن GAPDH در گروه NAR	22.06			0.00530522
13	Nar	22.45	28.92	6.47	8.44667	-1.97667	3.93583					میانگین ژن mmp9 در گروه NAR	28.735	0.00978644	1.99769
14	BB	21.67	27.46	5.79	8.44667	-2.65667	6.30574	0.522964
15	BB	22.35	27.98	5.63	8.44667	-2.81667	7.04533

## Sheet: IL1
		GAPDh	IL1					انحراف معیار								انحراف معیار
1	m.f	20.95	28.17	7.22	6.03667	1.18333	0.440333	0.621967				میانگین ژن GAPDH در گروه m.f	20.7167			0.621967
2	m.f	19.85	25.22	5.37	6.03667	-0.666667	1.5874					میانگین ژن IL1 در گروه m.f	25.22	0.0440922	1
3	m.f	21.35	26.87	5.52	6.03667	-0.516667	1.43065
4	Endo	22.31	26.36	4.05	6.03667	-1.98667	3.9632	0.633954				میانگین ژن GAPDH در گروه Endo	22.77			0.383625
5	Endo	23.23	27.65	4.42	6.03667	-1.61667	3.06666					میانگین ژن IL1 در گروه Endo	27.005	0.0531053	1.20442
6	Transfect	22.98	28.92	5.94	6.03667	-0.0966667	1.0693	0.0105549				میانگین ژن GAPDH در گروه Transfect	21.395			2.31055
7	Transfect	19.81	25.73	5.92	6.03667	-0.116667	1.08423					میانگین ژن IL1 در گروه Transfect	27.325	0.0164018	0.371989
8	T-exo	20.95	26.96	6.01	6.03667	-0.0266667	1.01866	0.487579				میانگین ژن GAPDH در گروه T-exo	20.85			0.487579
9	T-exo	20.75	28.39	7.64	6.03667	1.60333	0.329116					میانگین ژن IL1 در گروه T-exo	27.675	0.00882003	0.200036
10	EXO	21.82	27.87	6.05	6.03667	0.0133333	0.990801	0.00964539				میانگین ژن GAPDH در گروه EXO	20.65			1.71978
11	EXO	19.48	25.55	6.07	6.03667	0.0333333	0.97716					میانگین ژن IL1 در گروه EXO	26.71	0.0149885	0.339936
12	Nar	21.67	27.31	5.64	6.03667	-0.396667	1.31646	0.13842				میانگین ژن GAPDH در گروه NAR	22.06			0.94551
13	Nar	22.45	27.89	5.44	6.03667	-0.596667	1.51222					میانگین ژن IL1 در گروه NAR	27.6	0.0214928	0.487452
14	BB	21.67	26.05	4.38	6.03667	-1.65667	3.15287	0.0759421
15	BB	22.35	26.78	4.43	6.03667	-1.60667	3.04547

## Sheet: IDO
		GAPDh	IDO					انحراف معیار								انحراف معیار
1	m.f	20.95	28.35	7.4	7.27667	0.123333	0.918064	0.0912371				میانگین ژن GAPDH در گروه m.f	20.7167			0.0912371
2	m.f	19.85	27.14	7.29	7.27667	0.0133333	0.990801					میانگین ژن IDO در گروه m.f	27.14	0.0116516	1
3	m.f	21.35	28.49	7.14	7.27667	-0.136667	1.09936
4	Endo	22.31	28.2	5.89	7.27667	-1.38667	2.61474	0.0875676				میانگین ژن GAPDH در گروه Endo	22.77			0.418441
5	Endo	23.23	29.19	5.96	7.27667	-1.31667	2.4909					میانگین ژن IDO در گروه Endo	28.695	0.0164588	1.41258
6	Transfect	22.98	29.97	6.99	7.27667	-0.286667	1.21982	0.291477				میانگین ژن GAPDH در گروه Transfect	21.395			0.566725
7	Transfect	19.81	26.38	6.57	7.27667	-0.706667	1.63203					میانگین ژن IDO در گروه Transfect	28.175	0.00909948	0.780967
8	T-exo	20.95	28.01	7.06	7.27667	-0.216667	1.16205	0.185881				میانگین ژن GAPDH در گروه T-exo	20.85			0.0169569
9	T-exo	20.75	28.18	7.43	7.27667	0.153333	0.899171					میانگین ژن IDO در گروه T-exo	28.095	0.00659231	0.565788
10	EXO	21.82	28.78	6.96	7.27667	-0.316667	1.24545	0.166628				میانگین ژن GAPDH در گروه EXO	20.65			0.314618
11	EXO	19.48	26.19	6.71	7.27667	-0.566667	1.4811					میانگین ژن IDO در گروه EXO	27.485	0.00875911	0.751754
12	Nar	21.67	28.56	6.89	7.27667	-0.386667	1.30737	0.356014				میانگین ژن GAPDH در گروه NAR	22.06			0.356014
13	Nar	22.45	28.87	6.42	7.27667	-0.856667	1.81085					میانگین ژن IDO در گروه NAR	28.715	0.00992305	0.85165
14	BB	21.67	27.56	5.89	7.27667	-1.38667	2.61474	0.182578
15	BB	22.35	28.39	6.04	7.27667	-1.23667	2.35653

## Sheet: KRAS
		GAPDh	KRAS					انحراف معیار								انحراف معیار
1	m.f	20.95	29.31	8.36	8.31	0.05	0.965936	0.0299703				میانگین ژن GAPDH در گروه m.f	20.7167			0.063314
2	m.f	19.85	28.14	8.29	8.31	-0.02	1.01396					میانگین ژن KRAS در گروه m.f	28.14	0.00582578	1
3	m.f	21.35	29.63	8.28	8.31	-0.03	1.02101
4	Endo	22.31	28.24	5.93	8.31	-2.38	5.20537	0.489112				میانگین ژن GAPDH در گروه Endo	22.77			0.54659
5	Endo	23.23	28.98	5.75	8.31	-2.56	5.89708					میانگین ژن KRAS در گروه Endo	28.61	0.0174576	2.99661
6	Transfect	22.98	29.41	6.43	8.31	-1.88	3.68075	0.1484				میانگین ژن GAPDH در گروه Transfect	21.395			2.45255
7	Transfect	19.81	26.16	6.35	8.31	-1.96	3.89062					میانگین ژن KRAS در گروه Transfect	27.785	0.0119239	2.04675
8	T-exo	20.95	28.61	7.66	8.31	-0.65	1.56917	1.40446				میانگین ژن GAPDH در گروه T-exo	20.85			0.137598
9	T-exo	20.75	27.23	6.48	8.31	-1.83	3.55537					میانگین ژن KRAS در گروه T-exo	27.92	0.00744248	1.27751
10	EXO	21.82	28.26	6.44	8.31	-1.87	3.65533	0.255238				میانگین ژن GAPDH در گروه EXO	20.65			1.18478
11	EXO	19.48	26.07	6.59	8.31	-1.72	3.29436					میانگین ژن KRAS در گروه EXO	27.165	0.0109343	1.87688
12	Nar	21.67	29.13	7.46	8.31	-0.85	1.8025	0.767464				میانگین ژن GAPDH در گروه NAR	22.06			0.881254
13	Nar	22.45	29.23	6.78	8.31	-1.53	2.88786					میانگین ژن KRAS در گروه NAR	29.18	0.00718897	1.23399
14	BB	21.67	27.78	6.11	8.31	-2.2	4.59479	0.44012
15	BB	22.35	28.67	6.32	8.31	-1.99	3.97237

## Sheet: IL10
		GAPDh	IL10					انحراف معیار								انحراف معیار
1	m.f	20.95	23.84	2.89	2.81	0.08	0.946058	0.0479223				میانگین ژن GAPDH در گروه m.f	20.7167			0.18626
2	m.f	19.85	22.63	2.78	2.81	-0.03	1.02101					میانگین ژن IL10 در گروه m.f	22.63	0.265478	1
3	m.f	21.35	24.11	2.76	2.81	-0.05	1.03526
4	Endo	22.31	23.64	1.33	2.81	-1.48	2.78949	0.0275346				میانگین ژن GAPDH در گروه Endo	22.77			0.764398
5	Endo	23.23	24.54	1.31	2.81	-1.5	2.82843					میانگین ژن IL10 در گروه Endo	24.09	0.400535	1.50873
6	Transfect	22.98	24.97	1.99	2.81	-0.82	1.76541	0.146413				میانگین ژن GAPDH در گروه Transfect	21.395			2.25025
7	Transfect	19.81	21.64	1.83	2.81	-0.98	1.97247					میانگین ژن IL10 در گروه Transfect	23.305	0.266093	1.00231
8	T-exo	20.95	23.78	2.83	2.81	0.02	0.986233	0.21646				میانگین ژن GAPDH در گروه T-exo	20.85			0.182814
9	T-exo	20.75	23.19	2.44	2.81	-0.37	1.29235					میانگین ژن IL10 در گروه T-exo	23.485	0.160985	0.606397
10	EXO	21.82	23.35	1.53	2.81	-1.28	2.42839	0.273202				میانگین ژن GAPDH در گروه EXO	20.65			1.15493
11	EXO	19.48	21.26	1.78	2.81	-1.03	2.04202					میانگین ژن IL10 در گروه EXO	22.305	0.317538	1.1961
12	Nar	21.67	23.82	2.15	2.81	-0.66	1.58008	0.105353				میانگین ژن GAPDH در گروه NAR	22.06			6.36299
13	Nar	22.45	24.47	2.02	2.81	-0.79	1.72907					میانگین ژن IL10 در گروه NAR	24.145	0.235696	0.887816
14	BB	21.67	22.98	1.31	2.81	-1.5	2.82843	0.375495
15	BB	22.35	23.96	1.61	2.81	-1.2	2.2974

[truncated: 1 more sheets: u6]
