# Supplementary figures and images for: Evaluating the effect of exosome-encapsulated miR-4289 on menstrual blood-derived mesenchymal stem cells from endometriosis patients
Source: Research Square preprint supplement (doi:10.21203/rs.3.rs-6558623/v1), 2025-05-12

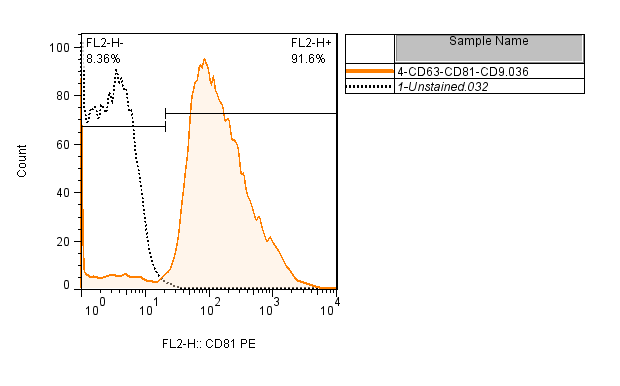


**
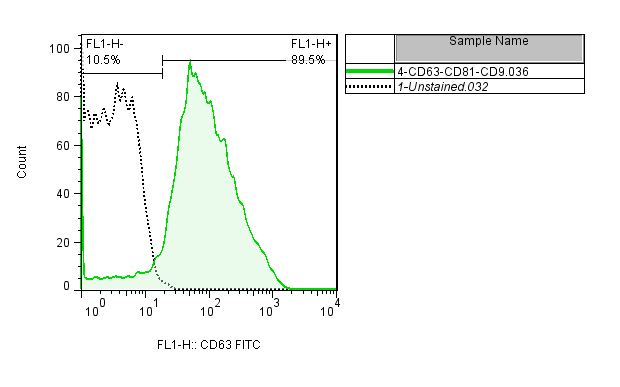
**

**
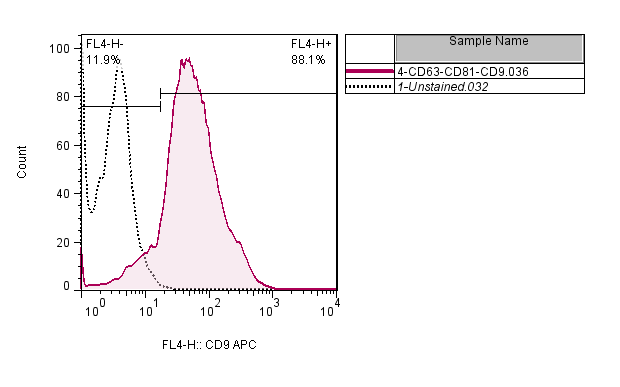
**


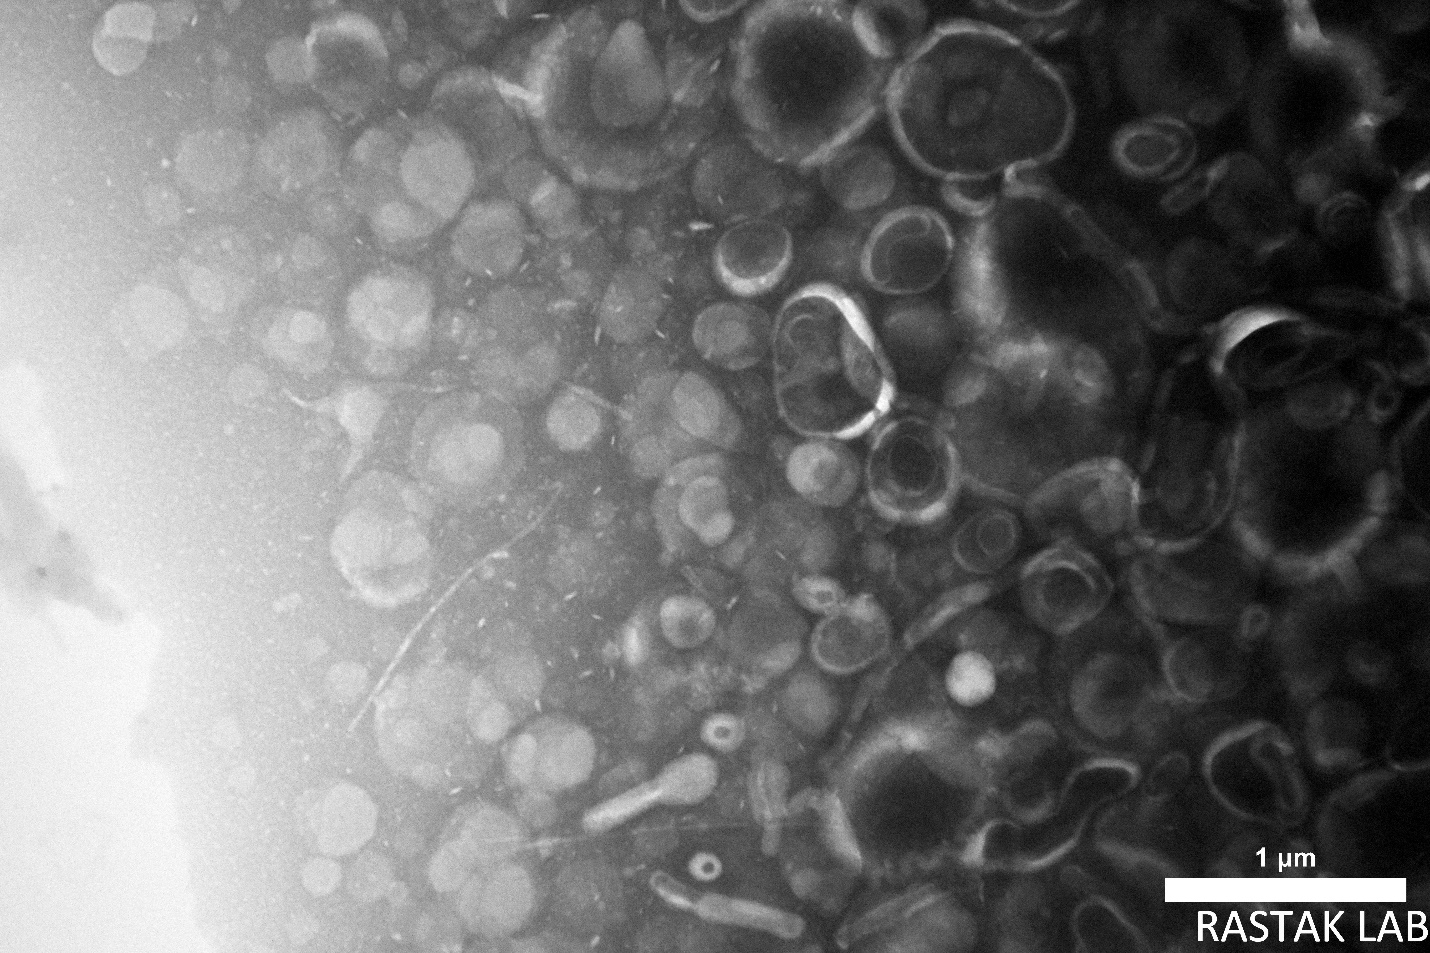

Supplement: Supplementary file 1 [file 3a57106fb82d06c667020e30.docx]
